# Supplementary material
Source: publisher site journal article supplement (https://www.dovepress.com/article/370486)

**Supplementary Figure 1** Kaplan–Meier curves corresponding to OS and PFS (before PSM). (A) Kaplan–Meier curves for OS; (B) Kaplan–Meier curves for PFS


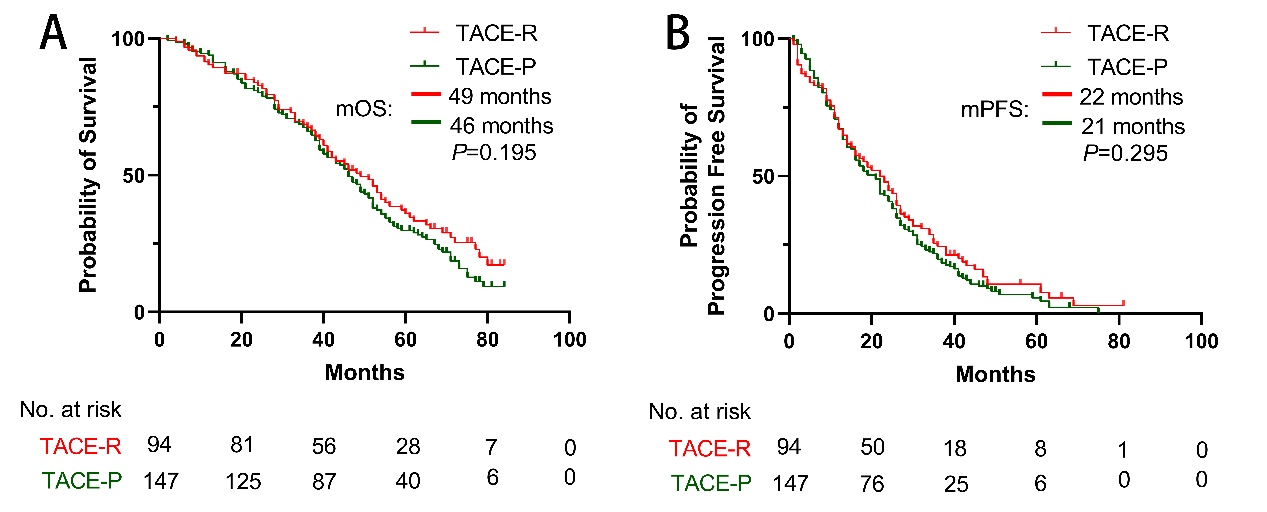


**Supplementary Figure 2** Forest plots for subgroup analysis (before PSM). (A) Forest plot for OS; (B) Forest plot for PFS


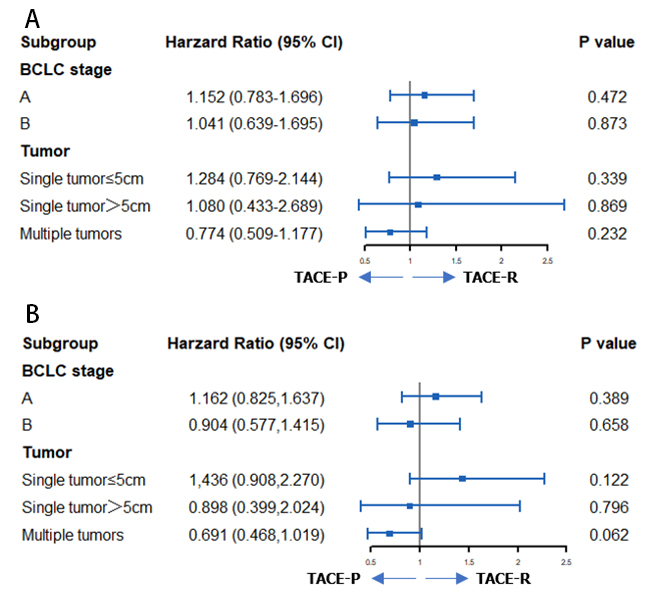

Supplement: Supplementary file 1 [file get_supplementary_file.php]
